# Supplementary material for: Does Avian Coronavirus Co-Circulate with Avian Paramyxovirus and Avian Influenza Virus in Wild Ducks in Siberia?
Source: MDPI journal article supplement (doi:10.3390/v15051121), 2023-05-07
Supplement: s1 [file s1]

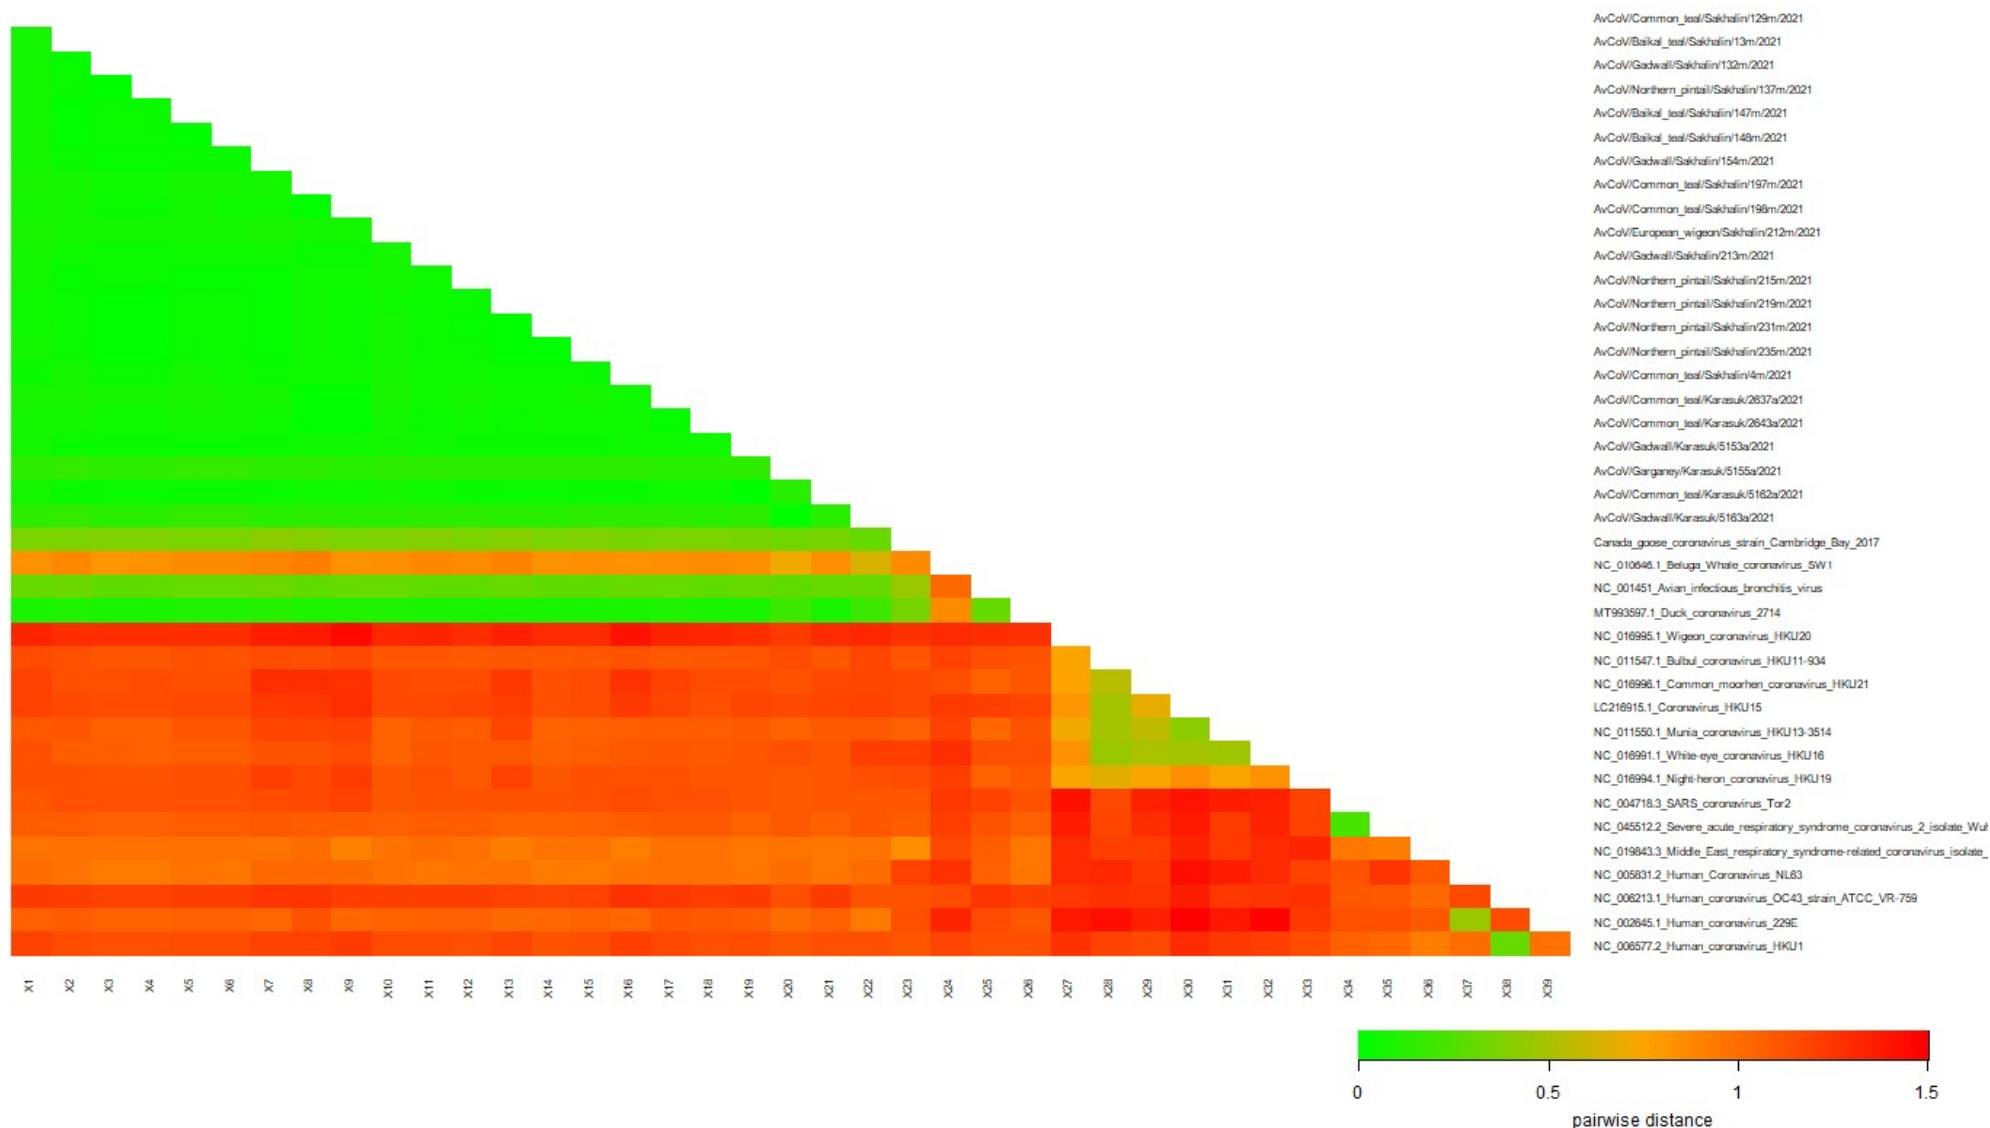

Figure S1. Heatmap with visualization of pairwise distances of nucleotide sequences of studied gammacoronaviruses and reference strains from four genera of coronaviruses: Alphacoronaviruses, Betacoronaviruses, Gammacoronavirus and Deltacoronavirus. The scale of pairwise distance is applied.
